# Supplementary material for: Long-term Outcomes of the Effects of Home Blood Pressure Telemonitoring and Pharmacist Management on Blood Pressure Among Adults With Uncontrolled Hypertension: Follow-up of a Cluster Randomized Clinical Trial
Source: PubMed Central journal article supplement (PMC6324502; doi:10.1001/jamanetworkopen.2018.1617), 2018-09-07
Supplement: jamanetwopen-1-e181617-s001.pdf [file jamanetwopen-1-e181617-s001.pdf]

1  
2

**2 R01 HL 090965 (Hyperlink) - Extended Follow-up Study**  
Manual of Procedures

3 **Table of Contents**

4 Introduction ..... 3

5 Project Summary..... 3

6 Study Procedures ..... 4

7     Study Timeline ..... 4

8     Eligibility ..... 4

9     Recruitment ..... 5

10        Identifying excluded participants ..... 5

11        Study Visits..... 5

12        Levels of follow-up..... 6

13        Recruitment letter ..... 6

14        Follow-up phone calls..... 7

15        Follow-up Recruitment Letter ..... 7

16        Database management ..... 7

17        Unresponsive patients..... 7

18        Reports generated by RedCap database ..... 8

19        Scheduling study visits..... 8

20 Study Visit Schedule..... 9

21 Visit 1 (54 months): For Riverside, Home Clinic, or Home visits ..... 9

22 Visit 1 for visits conducted at Primary Care Clinic ..... 12

23 Visit 1 conducted via mail/phone ..... 12

24 Visit 1 conducted by medical records only ..... 15

25 Visit 2 (54 months+2 weeks)..... 15

26 Cardiovascular Event, Death Records ..... 16

27 Focus Group Participation ..... 16

28 Participant Retention ..... **Error! Bookmark not defined.**

29 Data Management and Security ..... 20

30     Data Quality Plan ..... 20

31     Data Safety and Monitoring Board ..... 20

|    |                                                 |    |
|----|-------------------------------------------------|----|
| 32 | Data Security .....                             | 20 |
| 33 | Unanticipated Problems or Adverse Events .....  | 21 |
| 34 | Appendix A: Recruitment Letter .....            | 22 |
| 35 | Appendix B: Recruitment Phone Script .....      | 24 |
| 36 | Appendix C: Follow-up Recruitment Letter .....  | 27 |
| 37 | Appendix D: 54 Month Questionnaire.....         | 28 |
| 38 | Appendix E: Focus Group Recruitment letter..... | 36 |
| 39 | Appendix F: Focus group facilitation guide..... | 37 |
| 40 | Appendix G: Pharmacist Interview guide .....    | 39 |
| 41 | Anti-hypertensive Medications.....              | 42 |
| 42 |                                                 |    |
| 43 |                                                 |    |

## 44 Introduction

45 This project is for extended follow-up of participants in the Hyperlink study.

46

47 The study will observe participants through 54 months (4.5 years) from baseline to examine the  
48 long-term effects of the Hyperlink intervention on blood pressure and cardiovascular events.

49 We will also investigate cost effectiveness and dissemination of the intervention into regular  
50 health care practice.

## 51 Project Summary

52 Hypertension affects nearly 70 million Americans, and is effectively controlled in less than half.  
53 Because uncontrolled hypertension is a leading cause of stroke, congestive heart failure, renal  
54 disease, and myocardial infarction, development of cost-effective and scalable hypertension  
55 control strategies has been identified as an urgent national priority. The NHLBI-funded  
56 randomized HyperLink trial (Home Blood Pressure Telemonitoring and Case Management to  
57 Control Hypertension) has developed and implemented a very effective yet simple two-step  
58 non-office-based blood pressure (BP) control strategy: (a) patients measured BP at home using  
59 telemonitors that stored and electronically transmitted BP data to a pharmacist via a telephone  
60 modem, (b) In periodic telephone visits, pharmacists advised patients on medication adherence  
61 and lifestyle, and adjusted antihypertensive therapy under a collaborative practice agreement  
62 with primary care physicians. This simple strategy has now been rigorously evaluated in a  
63 randomized trial in which a high proportion of patients achieved and maintained BP control at  
64 6, 12, and 18 months following enrollment (71%-72%) compared to usual care (45%-57%,  $P < .01$   
65 at all time points). It achieved systolic BP 11 mm Hg lower at 6 months ( $P < 0.0001$ ), 10 mm Hg  
66 lower at 12 months ( $P < 0.0001$ ), and 7 mm Hg lower at 18 months ( $P = 0.004$ ) in the intervention  
67 group compared to the usual care group.

68

69 The purpose of this proposal is to extend follow-up of the 450 patients enrolled in the  
70 HyperLink intervention and usual care groups to achieve three specific aims: (a) provide new  
71 data on the long-term durability (b) assess the cost-effectiveness of the Hyperlink intervention,  
72 and (c) use mixed methods to identify critical factors for delivering the intervention successfully  
73 and translating it into practice. All patients will be invited to attend two research clinic visits to  
74 measure BP 5 years following enrollment. Extended data will include assessments of BMI,  
75 antihypertensive treatment and adherence, use of home BP monitoring, satisfaction with  
76 medical care, and surveillance for clinical cardiovascular events. Data collected at visits will be  
77 supplemented with interim BP measures extracted from electronic medical records. Long-term  
78 health impact and cost-effectiveness will be quantified using directly observed measures and  
79 state-of-the-art microsimulation prediction modeling of cardiovascular events and treatment  
80 costs. Focus groups and semi-structured interviews with study subjects, pharmacists, and  
81 health system stakeholders will provide additional perspectives on 1) optimizing successful  
82 delivery of the intervention, and 2) on strategies and barriers for translation into clinical  
83 practice. These results will fill critically important knowledge gaps and provide practical  
84 information about the costs and benefits of implementing a this scalable and effective new care

85 model that holds great promise for improving outcomes for millions of Americans with  
 86 uncontrolled hypertension.

87 **Study Procedures**

88 **Study Timeline**

89 This timeline is a revised version of our originally proposed study timeline. A more task-specific  
 90 timeline is kept in the project folder in the “Project Management/Project timeline” subfolder.  
 91

| Tasks                                              | Year 1 (Qtr)<br>2013 |   |   |    | Year 2 (Qtr)<br>2014 |    |    |    | Year 3 (Qtr)<br>2015 |    |    |    |
|----------------------------------------------------|----------------------|---|---|----|----------------------|----|----|----|----------------------|----|----|----|
|                                                    | 3                    | 6 | 9 | 12 | 15                   | 18 | 21 | 24 | 27                   | 30 | 33 | 36 |
| Phase 1 (Study Start-up)                           |                      |   |   |    |                      |    |    |    |                      |    |    |    |
| Finalize extension study MOP                       |                      |   |   |    |                      |    |    |    |                      |    |    |    |
| Obtain IRB approval                                |                      |   |   |    |                      |    |    |    |                      |    |    |    |
| Contact and consent study participants             |                      |   |   |    |                      |    |    |    |                      |    |    |    |
| Phase 2 (Data collection)                          |                      |   |   |    |                      |    |    |    |                      |    |    |    |
| Patient follow-up visits                           |                      |   |   |    |                      |    |    |    |                      |    |    |    |
| Pharmacist key informant interviews                |                      |   |   |    |                      |    |    |    |                      |    |    |    |
| Patient focus groups                               |                      |   |   |    |                      |    |    |    |                      |    |    |    |
| Clinical stakeholder interviews                    |                      |   |   |    |                      |    |    |    |                      |    |    |    |
| Phase 3 (Analysis & Dissemination)                 |                      |   |   |    |                      |    |    |    |                      |    |    |    |
| Periodic literature review                         |                      |   |   |    |                      |    |    |    |                      |    |    |    |
| Update analytic databases                          |                      |   |   |    |                      |    |    |    |                      |    |    |    |
| Extract and analyze data                           |                      |   |   |    |                      |    |    |    |                      |    |    |    |
| Preparation of journal manuscripts                 |                      |   |   |    |                      |    |    |    |                      |    |    |    |
| Present results at meetings and submit manuscripts |                      |   |   |    |                      |    |    |    |                      |    |    |    |
| Additional dissemination activities                |                      |   |   |    |                      |    |    |    |                      |    |    |    |

92

93 **Eligibility**

- |                                                |                                             |
|------------------------------------------------|---------------------------------------------|
| 94 <b>Inclusion:</b>                           | 103 <b>Exclusion:</b>                       |
| 95 - Previously enrolled in Hyperlink          | 104 - Deceased                              |
| 96 (n=450)                                     | 105 - Previously requested to not be        |
| 97 - Willing to participate in follow-up visit | 106 contacted by the study                  |
| 98                                             | 107 - Incident dementia, mental illness, or |
| 99                                             | 108 any other condition that would limit    |
| 100                                            | 109 ability to give informed consent (new   |
| 101                                            | 110 since original Hyperlink 18-month visit |
| 102                                            |                                             |

## 111 Recruitment

### 112 Identifying excluded participants

113 Prior to beginning recruitment, the study coordinators, project manager, and programmer will  
114 review records to identify participants who shall be excluded from the study for reasons of  
115 death, previously requesting to not be contacted by the study, and new dementia or mental  
116 illness.

117

118 Death: The programmer will review all medical record and claims data for evidence of  
119 death among the 450 participants. Patients who are deceased will be marked as  
120 excluded in the database for reason of death. Death records will be collected from the  
121 state and from medical records where possible (see below section on death records).

122

123 Previous study drop-outs: Participants will remain eligible and be contacted even if they  
124 were “lost to follow-up” (i.e., missed several visits or stopped responding to our  
125 attempts to reach them). Participants who dropped out for other reasons or specifically  
126 told us they do not want to be contacted by our study will be excluded from  
127 recruitment. The project manager and study coordinators will identify those participants  
128 using our old drop-out notes from the original Hyperlink study. The programmer will  
129 include drop-out information in the new study RedCap database, and the project  
130 manager and study coordinators will use those notes to make decisions about who to  
131 the initial recruitment letter to.

132

133 Former participants who dropped out for any reason are excluded from Hyperlink2  
134 recruitment.

135

136 Incident dementia or mental illness: The programmer will review all medical record and  
137 claims data for evidence of new dementia diagnosis or treatment and serious mental  
138 illness among the 450 participants. We will make note of participants with new  
139 dementia diagnosis so that during the consent process we can assess ability to consent.

140

141 Excluding participants: Indicate participant exclusion in RedCap by choosing “excluded from  
142 participation” on the Recruitment Form, selecting a reason for the exclusion, and leaving a note  
143 about the circumstances. The participant will thus be excluded from further attempts to  
144 contact or schedule visits.

### 145 Study Visits

146 There are two study visits:

- 147 • Visit 1: Due at 54 months from baseline, +/- 4 weeks.
- 148 • Visit 2: Due 2 weeks after Visit 1, +/- 5 days.

149

150 Participants should be scheduled within the time window if possible. It is preferred to schedule  
151 participants as closely to their 54 month date as possible.

152

153 If participants cannot be reached for some period of time, or for any other reason they can only  
154 be scheduled outside their time window, we will still schedule their visit and collect their data  
155 **up to 6 months on either side of their visit due date.** Participants who cannot attend a visit  
156 during that time period will not be included.

157

158 Focus group/interview participation will be determined in 2014. See that section of MOP for  
159 details.

### 160 **Levels of follow-up**

161 Participants will be invited to attend the two specified clinic visits at the Riverside Research  
162 Clinic. However, because some participants in the original study expressed distress at traveling  
163 to Riverside (and thus did not attend study visits), we will offer other options for participating  
164 (see Table 2).

165

166 These secondary options should ONLY be given if the participant otherwise declines  
167 participating at Riverside Clinic. They are also outlined in the Recruitment Phone Script (see  
168 next section on Follow-up phone calls and Appendix B).

169

170 Important note: If a patient says they do not want to participate, please go through all the  
171 levels of follow-up with them prior to considering them “excluded.” We would like to ensure  
172 patients have the chance to accept the medical records option for follow-up, so we can at least  
173 collect EMR data on them later.

174

| <b>Location</b>                      | <b>Visit 1</b> | <b>Visit 2</b> | <b>Measures</b>                        | <b>Compensation</b> |
|--------------------------------------|----------------|----------------|----------------------------------------|---------------------|
| Riverside (preferred)                | X              | X              | All                                    | \$40 V1, \$20 V2    |
| Participant’s home or primary clinic | X              |                | All                                    | \$20 (V1 only)      |
| Mail or phone                        | X              |                | Questionnaire and medical history only | \$10 (V1 only)      |
| Medical Records Only                 | X              |                | Only medication inventory from EMR     | None                |

### 175 **Recruitment letter**

176 After excluded participants are identified as excluded in the database, the recruitment letter  
177 will be mailed to all remaining participants.

178

179 RedCap Invitation Letter report: The report from RedCap will indicate all 450 participants,  
180 except for those excluded from participation. The report will list the participants’ name, DOB,  
181 MRN, and main address. It will also list the participants’ previous study dates and the  
182 participants’ upcoming study visit dates (54 months, 54 months+2 weeks).

183

184 Export the report to an Excel file and save in the project folder under “recruitment.” The excel  
185 file will be used to mail merge the participants’ name and address and study dates into the  
186 recruitment letter.

187  
188 The recruitment letter is found under **Appendix A**.

### 189 **Follow-up phone calls**

190 Timeline: Participants will be called for scheduling when they are within 3 months of their V1  
191 due date. The Upcoming V1 RedCap report indicates upcoming due visits.

192  
193 Phone script: Follow the Recruitment Phone Script (see **Appendix B**) to discuss the study with  
194 potential participants.

195  
196 Attempts to reach: Keep track of all phone calls placed to and received from patients in the  
197 Communication Log. Guidelines on number of calls to place are:

198  
199 Calls per week: Unlimited, but use judgment and no more than one call per day  
200 Voicemails per week: Two voicemails per week, up to two more in following week  
201 Calls before stopping calling: Up to your judgment, but should stop if have been calling  
202 for longer than 2-3 weeks without response (and move onto mailing)  
203

### 204 **Follow-up Recruitment Letter**

205 Once patient is determined difficult to reach or not answering phone, you can send a second  
206 follow-up letter stating that we have been trying to reach the patient for a study opportunity.  
207 Please log the second letter into the Recruitment form communication log.

208  
209 The follow-up recruitment letter is found under **Appendix C**.

### 210 **Database management**

211 All recruitment letters and phone calls and their outcomes will be logged in the RedCap  
212 database under each participant's Recruitment Form.

### 213 **Unresponsive patients**

214 When the coordinator cannot reach a participant using the initial means of recruitment letter  
215 and follow-up phone calls, we must make other attempts to reach the patient. These options  
216 should be exhausted before declaring a participant "lost."

217  
218 Electronic Medical Record: The coordinator will look in the participant's electronic  
219 medical record for any alternative contact information, including phone numbers or  
220 addresses, and/or any indication of backup or family contact information. If any  
221 alternative information is found, the coordinator will record with notes in the  
222 participant's RedCap recruitment form. The coordinator can then re-send the  
223 recruitment letter or begin calling the participant as appropriate. In the event of using  
224 backup or family contacts, the coordinator should NOT identify the research study as  
225 the reason for trying to get ahold of the patient. The coordinator can identify they are  
226 calling from HealthPartners, but nothing more specific.

227

228 Follow-up letter: After the above means are exhausted, we will send the recruitment  
229 letter a second time incase it was originally lost. We will include a cover letter explaining  
230 we have made several attempts to reach the participant but have not been able to get  
231 ahold of them. (Send both the original recruitment letter and follow-up letter together  
232 for this mailing – **Appendices A and C**).

233  
234 Checking death records: Every 6 months, the HPIER programmer will look in the EMR  
235 among participants for indication of death. However, upon continued inability to reach  
236 participants the coordinator may also look for indication of death in the EMR and  
237 through various other means (i.e., searching online databases). See death records  
238 section of MOP for record keeping instructions.

### 239 **Reports generated by RedCap database**

240 The RedCap project offers customizable reports to help us manage patient schedules and  
241 progress through the study. We can add reports as desired. Currently, the reports available are:

242  
243 Introduction letter: To send first letter to all patients. Data included: participant name,  
244 study ID, MRN and DOB, participant address and phone number, previous visit dates,  
245 and V1/V2 due dates. All visit dates and identifying information will be used for mail  
246 merging into the recruitment letter form.

247 Upcoming V1: Patients due for V1 in 3 months that require scheduling. Data needed: pt  
248 name, pt id, address, previous visit dates, and v1/v2 due dates. Patients will be excluded  
249 from this list once scheduled for V1.

250 Upcoming V1 or V2 not scheduled, reached max attempts to call: Needs action as  
251 “unresponsive participant.” Patients on this list are those with “not scheduled, reached  
252 max attempts - send letter” as call log outcome. Data needed: pt name, pt id, address,  
253 v1 or v2 due date (whichever relevant).

254 Sent letter, bad address: Need to investigate to find new address and re-send letter.  
255 Data needed: pt name, pt id

256 Visit No-Shows or incomplete visits: This list is of participants who scheduled V1 or V2  
257 visits but their V1 or V2 forms remain incomplete. They will require follow-up to re-  
258 schedule.

### 259 **Scheduling study visits**

260 Schedule visits in Epic under appropriate coordinator for following time periods:

261

- 262 • Visit 1 at Riverside: 1 hour
- 263 • Visit 1 at home or other clinic: 1 hour +/- 1 hour for travel and setup.
- 264 • Visit 2 (always at Riverside): 30 minutes



265  
 266 Visit scheduled dates should be recorded in the Recruitment Form under “Visit 1 date  
 267 scheduled” or “Visit 2 date scheduled.” Visit 2 may be scheduled at time of scheduling V1 or  
 268 during V1 itself.

269  
 270 Instruct patients to bring all current medications with them to their visit.  
 271

272 **Study Visit Schedule**

273 The table below shows the numbers of patients due for follow-up visits at various time points  
 274 per calendar month, not including those excluded for various reasons.

| 2013 |    |    |    | 2014 |    |    |    |    |    |    |    | 2015 |    |    |    |    |    |   |   |    |   |    |    |    |    |
|------|----|----|----|------|----|----|----|----|----|----|----|------|----|----|----|----|----|---|---|----|---|----|----|----|----|
| 9    | 10 | 11 | 12 | 1    | 2  | 3  | 4  | 5  | 6  | 7  | 8  | 9    | 10 | 11 | 12 | 1  | 2  | 3 | 4 | 5  | 6 | 7  | 8  | 9  | 10 |
| 6    | 15 | 29 | 28 | 30   | 30 | 19 | 47 | 19 | 14 | 26 | 18 | 17   | 15 | 11 | 10 | 10 | 15 | 6 | 5 | 16 | 6 | 15 | 15 | 23 | 5  |

275  
 276 All patients will have a 54 month visit (Visit 1). All V1s are due between September 2013 and  
 277 October 2015 and will occur between August 2013 and November 2015 including the +/-4 week  
 278 grace period.

279  
 280 All patients attending V1 at Riverside will have a V2 within two weeks of V1 +/- 1 week.  
 281 Therefore, all V2s will occur between September 2013 and December 2015.  
 282

283 **Visit 1 (54 months): For Riverside, Home Clinic, or Home visits**

284  
 285 **Visit Preparation**

- 286 Prior to Visit 1, prepare the following:
- 287 • Paper chart from Hyperlink 1
  - 288 • Blank consent form, HIPAA form, and ROI forms
    - 289 ○ Collect up-to-date ROI on all patients for future possible records collecting
  - 290 • Print medication list from Epic, identify which are anti-hypertnesion meds
  - 291 • iPad – make sure it’s charged, ready to use and logged into RedCap
  - 292 • Review RedCap Recruitment form for any possible sign of consenting issues (i.e.,  
 293 dementia diagnosis)

294  
 295 **Visit Procedures**

- 296 **1. Informed consent procedure.**
  - 297 a. Prior to leaving the patient alone with the consent forms, spend some time  
 298 talking to the patient about neutral topics and get a sense of their understanding  
 299 of why they are here today.
  - 300 b. For patients with any new dementia diagnosis or other reason to doubt ability to  
 301 consent, consult one of the clinicians on staff that day. If patient cannot tell you  
 302 about the study or what they are agreeing to, do not proceed with study visit.
  - 303 c. Offer to provide a copy of the signed consent form to the patient if so desired.

304  
305  
306  
307  
308  
309  
310  
311  
312  
313  
314  
315  
316  
317  
318  
319  
320  
321  
322  
323  
324  
325  
326  
327  
328  
329  
330  
331  
332  
333  
334  
335  
336  
337  
338  
339  
340  
341  
342  
343  
344  
345  
346  
347

**2. Verify/update patient contact information** on paper chart

**3. Medication inventory.**

- a. Ask patient to show you med bottles they brought into the visit.
- b. Ask the patient about each medication listed in their Epic chart, and verify the drug, dose and frequency for each medication.
- c. Make edits on Epic print-out or data collection form.
- d. Verify by looking at bottles, and reconcile any discrepancies between bottles and Epic list so you are sure you have collected accurate drug information.

**4. Cardiovascular history.**

- a. Ask patient questions in the cardiovascular event history section of the data collection form.
- b. For any event to which the patient answers “yes,” write down the closest date information, hospital/treating physician and a basic narrative of circumstances on the paper form. This will help us find the records later.
- c. Record information about any event the patient reports, even if it falls outside the window of dates you specifically asked about. We may uncover some previously un-reported events, and want to make sure we have the best self report data possible. When you enter these events into RedCap, you will see previously reported events entered and you will know whether we have that self-report already or not (for events occurring during Hyperlink 1 that may be reported to us here).
- d. When in doubt, record the information and allow the adjudication process to determine whether the event is relevant or not.

**5. Questionnaire.**

- a. Bring up the patient questionnaire on the iPad. Be sure to log out of RedCap and close the original RedCap tab prior to handing the patient their unique web-survey questionnaire. Instruct the patient on how to scroll through the page and tab between pages.
- b. If the patient has problems with the iPad or does not prefer to use it, you may print off a paper questionnaire from the project folder (found under Project Management/Forms and Questionnaires/Approved Materials). Fill out all the pages with the patient ID and date prior to administering.
- c. If the patient cannot complete the survey during the visit for some reason (i.e., needs glasses to read), you may either print off a copy of the patient questionnaire or have the web survey link emailed to them to fill out at home. If you take this option, provide the patient with a stamped envelope to return the paper survey (if paper is chosen). Be sure to indicate this option in RedCap so we can track the surveys sent home and follow up with patient if they do not return it within 2 weeks.

348  
349  
350  
351  
352  
353  
354  
355  
356  
357  
358  
359  
360  
361  
362  
363  
364  
365  
366  
367  
368  
369  
370  
371  
372  
373  
374  
375  
376  
377  
378  
379  
380  
381  
382  
383  
384  
385  
386  
387  
388  
389  
390  
391

**6. Physical Measures.**

- a. First bring patient out to be weighed and record in lbs on data collection form
- b. Then blood pressure:
  - i. Both feet uncrossed and flat on the ground
  - ii. Position patient’s arm with elbow at heart level. Adjust height of arm using room pillows if needed.
  - iii. Wrap cuff over uncovered upper arm with bladder over brachial artery
  - iv. Wrap snugly, but not so tight that cuff is restrictive
  - v. Explain the body position, quietness and time involved with measurement to patient
  - vi. Leave patient alone in room for 5 minutes in proper position
  - vii. Return to room to take first reading, wait one minute in between subsequent readings.
  - viii. Record all 3 blood pressure readings and the average of three
  - ix. Total time for blood pressure protocol is about 12 minutes

**7. Participant compensation and follow-up**

- a. Give patient \$40 Target gift card for their time. Record card # on paper chart.
- b. Tell patient about future focus group opportunity and ask whether they think they’d be interested
- c. Schedule Visit 2 for two weeks from Visit 1 date, +/- one week.

**Source documents**

All data should be recorded onto the data collection form and kept in the patient’s study chart, except for the questionnaire which is administered directly on the web survey. Any paper questionnaires administered should be kept in the paper chart, as well.

**Electronic data entry into RedCap**

- Recruitment Form: Update patient’s contact information if needed, enter Visit 2 scheduled date.
- V1 Data Collection Form: Enter all responses to fields included on this form, collected during visit. Matches the paper form including the same questions.
- 54 Month Questionnaire: Should be automatically filled out by patient completing web survey. If paper questionnaire completed, enter responses here.

When a patient’s information is complete for each form, change the status of the form from Incomplete/Unverified to Complete.

**Epic documentation**

The study visit should be documented in Epic as a provider encounter using the Hyperlink visit summary template and accompanying smartsets. The study visit should be copied to the primary care providers’ inbox. Contact Deana Grabow for any problems with the Epic documentation.

## 392 **Visit 1 for visits conducted at Primary Care Clinic**

393

### 394 **Visit Preparation**

395 If a patient would like to elect this option for follow-up, gather the patient's schedule  
396 preference and then consult with Anna so she can contact the clinic CDS to clear the visit. Anna,  
397 the CDS, and the scheduling coordinator can work together to schedule the visit and arrange  
398 logistics. You'll need a private exam room for about an hour and access to a scale.

399

400 Prior to Visit 1, prepare the following:

- 401 • Everything the same as visits at Riverside
- 402 • Bring a \$20 gift card with you for

403

### 404 **Visit Procedures**

405 Follow all the same visit procedures as though it were a Riverside visit.

406

#### 407 **1. Participant compensation and follow-up**

- 408 a. Give patient \$20 Target gift card for their time. Record card # on paper chart.
- 409 b. Patient will not be invited to FG or to a V2 blood pressure check

410

### 411 **Source documents and electronic data entry into RedCap**

412 Follow all the same documentation procedures as though it were a Riverside visit.

413

### 414 **Epic documentation**

415 You can choose whether to enter the visit/encounter info from the primary clinic or from  
416 Riverside. It can be documented as a Riverside Visit. Make note that the visit actually occurred  
417 off-site.

## 418 **Visit 1 conducted via mail/phone**

419 Patients who do not want to come to Riverside or a home/clinic visit can elect to conduct their  
420 visit via mail or phone. Phone visits will be less robust than mail visits. At each visit, a smaller  
421 subset of data are collected:

422

### 423 **Phone Visit Preparation**

424 Phone visits will likely occur at the time you call someone to schedule their V1. Therefore you  
425 will not have much prepared, and that's okay. It might be easiest to schedule a phone visit so  
426 you have time to prepare, but this can be done on the fly if needed.

427

428 Prior to asking any study related questions, you must pause and gather the following:

- 429 • Elements of consent document
- 430 • Paper forms for the patient questionnaire and the 54 month data collection form
- 431 • Patient's epic chart
- 432 • Review Redcap Recruitment form for any possible sign of consenting issue (i.e., new  
433 dementia diagnosis)

434

435 **Phone Visit Procedures**

436  
437  
438  
439  
440  
441  
442  
443  
444  
445  
446  
447  
448  
449  
450  
451  
452  
453  
454  
455  
456  
457  
458  
459  
460  
461  
462  
463  
464  
465  
466  
467  
468  
469  
470  
471  
472  
473  
474  
475  
476  
477  
478

- 1. Informed consent procedure.**
  - a. Prior to proceeding with any questions, review the Elements of Consent document with the patient. If they do not want to hear the whole document read to them, then tell them you will send it to them in the mail so they can review. If they agree to proceed with the study questions, they imply their consent to participate in the study, which they can always withdrawal at a later date.
  
- 2. Verify/update patient contact information** on paper chart.
  
- 3. Medication inventory.**
  - a. Ask the patient about each medication listed in their Epic chart, and verify the drug, dose and frequency for each medication.
  - b. Make edits on Epic print-out or data collection form.
  
- 4. Cardiovascular history.**
  - a. Ask patient questions in the cardiovascular event history section of the data collection form.
  - b. For any event to which the patient answers “yes,” write down the closest date information, hospital/treating physician and a basic narrative of circumstances on the paper form. This will help us find the records later.
  - c. Record information about any event the patient reports, even if it falls outside the window of dates you specifically asked about. We may uncover some previously un-reported events, and want to make sure we have the best self report data possible. When you enter these events into RedCap, you will see previously reported events entered and you will know whether we have that self-report already or not (for events occurring during Hyperlink 1 that may be reported to us here).
  - d. When in doubt, record the information and allow the adjudication process to determine whether the event is relevant or not.
  
- 5. Questionnaire.**
  - a. Bring up the patient questionnaire on the iPad. Be sure to log out of RedCap and close the original RedCap tab prior to handing the patient their unique web-survey questionnaire. Instruct the patient on how to scroll through the page and tab between pages.
  - b. If the patient has problems with the iPad or does not prefer to use it, you may print off a paper questionnaire from the project folder (found under Project Management/Forms and Questionnaires/Approved Materials). Fill out all the pages with the patient ID and date prior to administering.
  - c. If the patient cannot complete the survey during the visit for some reason (i.e., needs glasses to read), you may either print off a copy of the patient

479 questionnaire or have the web survey link emailed to them to fill out at home. If  
480 you take this option, provide the patient with a stamped envelope to return the  
481 paper survey (if paper is chosen). Be sure to indicate this option in RedCap so we  
482 can track the surveys sent home and follow up with patient if they do not return  
483 it within 2 weeks.  
484

#### 485 **6. Physical Measures.**

- 486 a. First bring patient out to be weighed and record in lbs on data collection form
- 487 b. Then blood pressure:
  - 488 i. Both feet uncrossed and flat on the ground
  - 489 ii. Position patient's arm with elbow at heart level. Adjust height of arm  
490 using room pillows if needed.
  - 491 iii. Wrap cuff over uncovered upper arm with bladder over brachial artery
  - 492 iv. Wrap snugly, but not so tight that cuff is restrictive
  - 493 v. Explain the body position, quietness and time involved with  
494 measurement to patient
  - 495 vi. Leave patient alone in room for 5 minutes in proper position
  - 496 vii. Return to room to take first reading, wait one minute in between  
497 subsequent readings.
  - 498 viii. Record all 3 blood pressure readings and the average of three
  - 499 ix. Total time for blood pressure protocol is about 12 minutes

#### 501 **7. Participant compensation and follow-up**

- 502 a. Give patient \$40 Target gift card for their time. Record card # on paper chart.
- 503 b. Tell patient about future focus group opportunity and ask whether they think  
504 they'd be interested
- 505 c. Schedule Visit 2 for two weeks from Visit 1 date, +/- one week.  
506

#### 507 **Source documents**

508 All data should be recorded onto the data collection form and kept in the patient's study chart,  
509 except for the questionnaire which is administered directly on the web survey. Any paper  
510 questionnaires administered should be kept in the paper chart, as well.  
511

#### 512 **Electronic data entry into RedCap**

- 513 • Recruitment Form: Update patient's contact information if needed, enter Visit 2  
514 scheduled date.
- 515 • V1 Data Collection Form: Enter all responses to fields included on this form, collected  
516 during visit. Matches the paper form including the same questions.
- 517 • 54 Month Questionnaire: Should be automatically filled out by patient completing web  
518 survey. If paper questionnaire completed, enter responses here.  
519

520 When a patient's information is complete for each form, change the status of the form from  
521 Incomplete/Unverified to Complete.  
522

523 **Epic documentation**

524 The study visit should be documented in Epic as a provider encounter using the Hyperlink visit  
525 summary template and accompanying smartsets. The study visit should be copied to the  
526 primary care providers' inbox. Contact Deana Grabow for any problems with the Epic  
527 documentation.  
528

529 **Visit 1 conducted by medical records only**

530 Patients who decline a clinic, home, or phone visit may provide consent for medical record  
531 review instead. If a patient consents to medical record review, their Epic record will be  
532 reviewed for the following data points:  
533

- 534 1. Medication inventory
    - 535 a. Use current medication list in Epic
  - 536 2. Cardiovascular history
    - 537 a. Search chart review for any of the relevant cardiovascular events of interest  
538 within the specified time range for that patient
    - 539 b. Request any supporting records needed for adjudication
- 540

541 Keep all source documentation as described above for other visit types. Record data in the  
542 patient's Redcap record for V1 as a 'medical records only' visit type. Complete the form when  
543 data entry is done.  
544  
545

546 **Visit 2 (54 months+2 weeks)**

547  
548 The purpose of the 2-week follow up visit (V2) is to take a second set of blood pressure  
549 measurements to improve accuracy of the long-term blood pressure outcome. Only patients  
550 who attended their 54 month V1 at Riverside Clinic are eligible for V2. Patients electing for their  
551 V1 at their home clinic, home, over the phone, or via medical records will not have this blood  
552 pressure measurement performed.  
553

- 554 1. Physical Measures
  - 555 a. Take the patient's blood pressure three times, 1 minute apart, as described in  
556 the methods above for V1.
- 557  
558 2. Data collection
  - 559 a. Confirm whether the patient has changed any medications since their V1. If they  
560 have, record all med name and dose changes.
  - 561 b. The blood pressure data will be recorded in a separate RedCap form (called V2)  
562 for each patient.

563 There is no questionnaire collected at V2

564 3. Data entry into RedCap

- 565 a. Record any med changes in the V2 form
- 566 b. Record each blood pressure and heart rate value
- 567 c. Record gift card number dispensed to patient and confirm you have provided a
- 568 “completion certificate” to the patient
- 569 d. Complete the RedCap form once all entry is done
- 570

571 **Cardiovascular Event, Death Records**

572 We will collect medical records of all reported events that are collected from the V1 questions.  
 573 Most of the questions have very clear yes or no answers, but occasionally there will be “gray  
 574 area” events that are unclear as to whether an event of interest actually occurred.

575  
 576 Please print or request records for all events of interest and re-route to Anna’s office at  
 577 Ceridian. For hospital stays, we need discharge summaries if possible. For ED visits we need an  
 578 ED summary. For anything involving an office visit, we’d like to see the office visit where the  
 579 diagnosis was made or event described. If you cannot locate these, please send any  
 580 documentation you can find that references the incident and we will track down any necessary  
 581 supporting docs.

582  
 583 As for deaths, we will collect death information for all patients that we learn have died during  
 584 the study period. Please inform Anna when a death has occurred. If the death occurred during  
 585 an attempt for recruitment, please mark “excluded” in the recruitment database with the  
 586 reason being deceased. Please also note all details that you know of surrounding the death so  
 587 that we can track down the necessary documentation. For patients who you learn have  
 588 deceased at some time later, please let Anna know. We will be recording all deaths. For death  
 589 adjudication,

590  
 591 All events and death reports will be reviewed by Karen or Joann to determine the final event  
 592 category. Anna will coordinate this and keep a spreadsheet of all reports and final  
 593 adjudications.

594 **Focus Group Participation**

595  
 596 **Identification and Recruitment of FG participants**

597 We will hold a series of patient focus groups to better understand the reasons some patients  
 598 were more successful in lowering their blood pressure through this intervention than others.  
 599 Focus groups will be stratified by: treatment group, blood pressure patterns over time.

600  
 601 We will select focus group participants among those completing a V1 visit. Among those  
 602 patients, we will sort by treatment group X blood pressure outcomes at 6, 12, 18, and 54  
 603 months. The following strata are identified:

604

|                             |                      |
|-----------------------------|----------------------|
| Telemonitoring Intervention | Usual Care           |
| 1a. Always in control       | 1. Always in control |



|                                                     |                                 |
|-----------------------------------------------------|---------------------------------|
| 1b. Always in control, not long term (relapsed 54m) |                                 |
| 2. Never in control                                 | 2. Never in control             |
| 3. Achieved control and maintained, late start      | 3. Achieve control at 12 months |
| 4. Relapsers (mixed)                                | 4. Relapsers (mixed)            |

605  
606 Patients falling into these categories will be invited to join a focus group by mail, followed by a  
607 phone call from the project manager. See **Appendix E** for focus group recruitment material.  
608

609 Groups will be scheduled as they fill with at least 4 participants. Ideally groups will have 5-7  
610 participants each.

611  
612  
613 **Focus Group guide**

614 See **Appendix F** for final focus group facilitation guides.  
615

616 **Conducting the Focus groups**

617 [Procedures for conducting the focus groups are as follows:](#)

618 **Purpose**

619 The purpose of these discussion groups is to learn why some participants had better results  
620 with Hyperlink than others in lowering their BP. We have selected groups of participants based  
621 on how their blood pressure changed over time during the intervention and long after.  
622

623 **Facilitator:** Anna

624 **Co-facilitator/assistant:** Ann Tucker, Julie Anderson, Sarah Basile, Amy LaFrance  
625

626 **Preparations ahead of group (week before/day before)**

- 627
- 628 • Gift cards
    - 629 ○ \$50 Target gift cards will be purchased and kept in Anna’s locked desk at  
630 Riverside. All the serial #s will be tracked in this spreadsheet: (make  
631 spreadsheet). Prior to group, cards will be recorded with date and participant’s  
632 studyID they are given to in that sheet.
  - 633 • Scheduling Riverside conference rooms
    - 634 ○ To schedule a conference room, contact:
    - 635 ○ Book the room an hour prior to group starting and 30 minutes after ending, if  
636 possible (at least 30 minutes on either side)
    - 637 ○ Ensure there are proper plugs accessible in the chosen conference room
  - 638 • Food
    - 639 ○ Jimmy Johns online [www.jimmyjohns.com](http://www.jimmyjohns.com)
    - 640 ○ Order 15-piece party platter with mix of sandwich types (\$26.99) and one cookie  
641 tray (\$19.99). Delivery fee is \$4. Total food cost per group: \$54.46
    - 642 ○ Cups available from Riverside Clinic. Designate some pitchers for ice/water.
  - 643 • Materials – *all will be stored in Anna’s desk at Riverside*

- 643 ○ Participant consent forms are stored in Anna's desk in a purple folder. Here is
- 644 the original version for printing if needed: [Focus Group Materials\IRB](#)
- 645 [Materials\IRB Approved FG Materials\IRB approval of FG materials and consent](#)
- 646 [form.pdf](#)
- 647 ○ Nametag stickers
- 648 ○ Pens for consenting and sharpies for nametags
- 649 ○ Parking passes

650

### 651 **Day of group**

- 652 ● 1 hour prior:
  - 653 ○ Set up signs in lower level. Obtain easel from Sherry Cole in administration and
  - 654 place past registration desks to point patients to the Falk rooms.
  - 655 ○ Set up recording equipment and laptop in conference room
  - 656 ○ Arrange tables appropriately for group
- 657 ● 30 mins prior: Jimmy John's delivered. Fill up pitchers with ice and water. Make coffee
- 658 on lower level.
- 659 ● As participants arrive:
  - 660 ○ Greet participants, shake hands and introductions
  - 661 ○ Have them fill out a nametag
  - 662 ○ Give them a consent form and tell them to review it while they have some food
  - 663 and get settled in
  - 664 ○ One by one, Anna will call participants over to a private area to talk with them
  - 665 and review and sign the consent form
  - 666 ○ A participant roster will be created for each group listing who is present. Names
  - 667 can be checked off as they arrive.

668

### 669 **Group will start promptly at the designated hour**

670

### 671 **During the group: note taking**

- 672 ● The co-facilitator's main role during the group will be taking notes. Notes will be
- 673 attached to the file with the group roster and brought up on Anna's computer.
- 674 ● Format of notes:
  - 675 ○ Notes can be formatted however the notetaker prefers. Speakers can be
  - 676 identified by first names or by initials or speaker #s. Please just make a note of
  - 677 how you refer to each participant in the notes so we can de-identify them easily
  - 678 later.
  - 679 ○ Please also periodically record the time in the notes so we can match them up
  - 680 with the audio recording and transcript
  - 681 ○ Notes should be as close to verbatim as you can get, given so much talking. If you
  - 682 can't get it word for word, please try to get as close to as possible and indicate
  - 683 where you're not sure what was said. You can paraphrase by leaving words out,
  - 684 but please do not construct meaning or interpret what the participant is saying
  - 685 when you record the notes.

- 686                   ○ You can provide your own interpretation, further questions, or comments as an  
687                   aside in parentheses if you choose to do so.

688

689 **During the group: facilitation**

- 690                   • Anna will start out the group with a welcome and a request for everyone to respect  
691                   the privacy of the other participants by keeping what is discussed in this room  
692                   private to the room.
- 693                   • We will lead introductions around the room with participants name, where they are  
694                   from, and their favorite thing about this past summer (or another ice breaker)
- 695                   • Anna will facilitate the group entirely. If the note taker has more reflections or  
696                   questions, we will wait until the end of the group to go back to them to allow space  
697                   for things to arise spontaneously from the participants.

698

699 **After the group**

- 700                   • Each participant should receive a gift card and parking pass
- 701                   • Recording will be confirmed
- 702                   • Note taker and Anna will sit down to de-brief and go over the notes, identify themes  
703                   that stood out and questions that seem interesting to follow up more on. Should also  
704                   make any relevant notes on certain participants and where they seem to be coming  
705                   from, to help with interpretation of transcripts in the future.

706

707 *Co-facilitator/note taker should effort time spent on this group to [Hyperlink2 x1207900](#)*

708

709 **Pharmacist Interviews**

710 We will conduct in-depth interviews with each telemonitoring intervention pharmacist (n=4) for  
711 the purpose of understanding factors in patients’ success according to their clinical point of  
712 view.

713

714 Each pharmacist will be invited for an interview and will receive a thank-you gift card. Two of  
715 the intervention pharmacists no longer work for HealthPartners but will be interviewed by  
716 phone.

717 **Interview guide**

718 See **Appendix G** for the final pharmacist interview guide.

719

720 **Conducting the interview**

721 Interviews will be conducted by project manager Anna. The interview guide will be followed  
722 and the interview will be audio recorded. Interviews will be conducted in the MTM’s office or  
723 by phone. After the interview is complete, audio recordings will be transcribed and the audio  
724 file and transcription saved on the project drive. All interviewees will receive a \$50 gift card for  
725 participating.

726 **Data Management and Security**

727 **Data Quality Plan**

728

729 Data will be reviewed quarterly starting in Jan 2014. Our primary concern is with:

- 730 • Data completeness (missing visits and missing values)
- 731 • Visit timeliness (in window/out of window/avg. time of followup)
- 732 • Overall patient flow (pt dispositions).
- 733 • We can also tabulate frequencies and means on key variables to look for
- 734 outlying/implausible values.

735

736 The flow diagram is constructed of elements we already collect in RedCap in the Study Progress  
737 Report. We will update this with each quarter for presentation to the group in Jan, April, July,  
738 and October of each year.

739

740 **Data Safety and Monitoring Board**

741 There is no DSMB for this project, as the study is only observational and does not have an  
742 intervention component.

743

744 **Data Security**

745 **iPad security**

746 iPads will be stored in locked cabinets in the Riverside Clinic. Only coordinators on the  
747 Hyperlink project will have access to the iPads. They will be secured by HealthPartners IS&T and  
748 in the event they are misplaced, stolen, or otherwise not in our possession will be wiped clean  
749 of all data. There should not be any PHI stored on the iPads. Only RedCap should be accessed  
750 via the internet and the coordinator's password to the RedCap website should be entered each  
751 time, not saved for automatic log-in.

752

753 At the conclusion of the study, iPads will remain in possession of the Riverside Clinic until  
754 requested to be returned by NHLBI.

755 **RedCap access**

756 Access to the Hyperlink RedCap project is restricted to: Riverside coordinators collecting  
757 Hyperlink data, project manager, statistician, and programmer who created the RedCap  
758 project record.

759

760

761 **Qualitative data recordings**

762 All audio recordings and transcriptions will be kept in a project drive folder protected by  
763 password and drive access permission.

764

765 **Unanticipated Problems or Adverse Events**

766 Because this is an observational study without intervention, we are not systematically  
767 monitoring patients for medical events potentially related to hypertension treatment. We will,  
768 however, record all self-reported cardiovascular events as described above which will be  
769 assessed for potential relationship to hypertension treatment. Self-reported data will be  
770 supplemented with claims and medical records at the conclusion of the study.

771  
772 Any unanticipated problems related to patient safety, privacy, or other concerns will be  
773 reported to the IRB if applicable.

774

775

776 **Appendix A: Recruitment Letter**

777  
778 Dear [Participant’s Name],

779  
780 I am writing to thank you for your participation in Hyperlink, the blood pressure study you were enrolled  
781 in for about 18 months between 2009-2012.

782  
783 You might recall that the purpose of the Hyperlink study was to test a program for blood pressure  
784 management that involved using a home blood pressure telemonitor and receiving support from a  
785 pharmacist over 12 months. About half the participants received that program, and the other half  
786 worked with their doctors like they normally would. Everyone in the study was invited to an enrollment  
787 visit at the HealthPartners Riverside Research Clinic and then to follow-up visits at 6, 12, and 18 months  
788 after enrollment. We are happy to report that we have now completed all those visits, and we are  
789 thankful for your participation.

790  
791 The Hyperlink study was quite successful in gathering new information about blood pressure  
792 management. Our short-term results suggest the home monitoring and pharmacist support combination  
793 was effective in helping people lower their blood pressure. We will be sharing the official results with  
794 you soon via newsletter, so please watch for that information.

795  
796 It is important for us to know if the short-term results translate to long-term effects, so we have applied  
797 for and received funding to conduct a follow-up study to continue to observe your blood pressures  
798 through up to 54 months (4.5 years) from enrollment. **Therefore, we would like to invite you to**  
799 **continue your participation in Hyperlink by attending two further visits at our Riverside Research**  
800 **Clinic.**

801  
802 Everyone is invited to come back for one visit at 54 months (4.5 years) after enrollment, and a second  
803 visit two weeks later. Below are the dates of your previous Hyperlink visits, and your potential future  
804 visit dates:

805

|                            |                                 |
|----------------------------|---------------------------------|
| Enrollment                 |                                 |
| 6 months                   |                                 |
| 12 months                  |                                 |
| 18 months                  |                                 |
| <b>54 months</b>           |                                 |
| <b>54 months + 2 weeks</b> | <b>2 weeks later (BP check)</b> |

806  
807 The first visit would involve taking your blood pressure and filling out questionnaires similar to what you  
808 did in the past. The second visit would be only a simple blood pressure check. There will be no labs with  
809 these visits, and you will receive a \$40 gift card for the 54 month visit and a \$20 gift card for the second  
810 visit (BP check). Participation in this study does not involve any additional home monitoring or  
811 pharmacist services – you will just continue taking care of your blood pressure like you normally would.  
812 Finally, you may also be invited to provide feedback about your experience in Hyperlink through focus  
813 groups or interviews. You will be notified separately if selected for that part of the study. Because these  
814 visits were not part of our original plan, we will have a new consent form for you to review and sign that  
815 will explain other details of the new study elements.

816

817 You will receive a phone call from our Riverside Research Clinic staff about three months prior to your  
818 54 month visit to discuss the opportunity further and answer any questions. If you'd like, you can also  
819 call us at 612-341-1950. If you do not wish to participate in the long-term study, you can notify us by  
820 calling that number.

821  
822 Thank you for thinking about the study. Your participation in Hyperlink has been so valuable, and we  
823 look forward to continuing to work with you in the future.

824  
825 Warm wishes,  
826

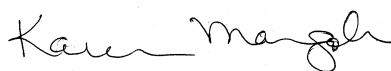 827  
828  
829

830 Karen Margolis, MD, MPH  
831 Hyperlink Principal Investigator  
832 HealthPartners Research Foundation  
833  
834  
835

836 **Appendix B: Recruitment Phone Script**

837

838

**Hyperlink Extended Follow-up**

839

**Recruitment Phone Script**

840 *Note: This script will appear for each patient in a “recruitment” section of our database, likely in*

841

*RedCap. Fields will be entered using either text or check-boxes.*

842

843 Patient Name:

844 Gender:

845 DOB:

846 MRN:

847 Phone #1:

848 Phone #2:

849

850 Call attempt #: (1, 2, 3, 4, 5)

851 Date/time of call:

852 Outcome of call: (*No answer, left message, successful contact*)

853

---

854

855 Researcher: Hello, may I please speak with (Participant’s name)?

856 Non-participant answering: No, he/she is **not** home.

857 Researcher: What would be a good time for us to callback? (*Record notes in recruitment*

858 *database, with suggested date/time for return call*)

859

860 Participant: **Yes**, this is (Participant).

861 Researcher: Hi (Participant), this is (Research coordinator) and I am calling from

862 HealthPartners Riverside Research Clinic with the Hyperlink study. How are you

863 today? (*Wait for answer*)

864

865 In August 2013, we mailed you a letter about a follow-up study we are

866 conducting to Hyperlink. Did you receive that letter? (*Wait for answer, proceed*

867 *to explain what was in the letter whether they got it or not*)

868

869 We are interested in inviting you back to another two visits to check your blood

870 pressure and ask you some more questions. For you, those visits would be due

871 around [**54 month visit date**], and then two weeks after that. We are interested

872 in finding out if the results from Hyperlink last for a long time or not. You would

873 get paid \$40 for each of those visits. We also will select certain people to invite

874 to be in focus groups to tell us about their experience in Hyperlink so we can

875 figure out how to make it work for everyone. That would be later on in the study,

876 though and would be optional for those invited.

877

878 Does this opportunity interest you at all?



879

880 Participant: → **No**.

881 Researcher: May I ask why? We want to make it easy for everyone to join.

882

883 Participant: *(Inconvenient, too far away, don't like driving to Minneapolis, etc)*

884 Respondent: Would it work better for you if we could meet you at your regular clinic

885 to conduct the visit? You would get a free blood pressure check that way,

886 and you could still participate without the hassle.

887 Participant: → **Yes**, that would work.

888 Researcher: Great. You would be due for the first visit on *(date)*. Can we call

889 you closer to that date to schedule? *(If yes, say thank you and*

890 *record info. If it's already close to the date, move on to scheduling*

891 *the first visit)*.

892 Participant: → **No**, I don't want to come in for any visits.

893 Researcher: Okay, I understand. Would you be interested in answering any

894 questionnaires by mail? They would be the same you'd fill out at

895 the visit, except we'd mail them to you with an envelope to return

896 them by mail. It would be one packet per year, and would take

897 about 30 minutes to fill out total. Alternatively we could just call

898 you and ask you the survey questions over the phone when your

899 due dates come. That would also take about 30 minutes and

900 you'd still receive the \$40 gift card for each survey you answer.

901 → **P: Sure**, the MAIL option sounds fine.

902 R: Great! I will note that here, and you will receive a

903 packet in the mail around your due date. If we don't hear

904 from you after about 3 or 4 weeks we'll call you to make

905 sure you received it. *(Confirm best phone number to use,*

906 *mailing address, etc. Make notes in recruitment database)*

907 → **P: Sure**, the PHONE option sounds fine.

908 R: Great! I will note that here. Do you have a certain time

909 of day that is best to call you? Would you prefer us to

910 schedule a specific 30 minute period with you to conduct

911 the phone surveys? *(Confirm best phone number to use,*

912 *time to call, mailing address for gift cards, etc. Put on*

913 *schedule if necessary. Make notes in recruitment database)*

914 → **P: No**, I don't want to do either of those.

915 R: Fair enough. We certainly understand. Even if you

916 prefer not to make visits or communicate with us by

917 phone/mail, it would still be very helpful to the study if we

918 were able to check your HealthPartners medical records.

919 We would look for blood pressures from your doctor visits,

920 blood pressure medicines, and other cardiovascular

921 problems if you have any. The information would be kept

922 strictly confidential and not shared with anyone outside

923 the study, and your name will be separated from the  
924 information. Would you be able to give us permission to  
925 look at your medical records during the study time period  
926 in order to look for hypertension related information?  
927 → **P: Yes** that's fine.  
928 R: Thank you very much, and thank you for your time.  
929 Have a great day!  
930 → **P: No**  
931 R: Okay. We will respect your wishes and not use your  
932 information for this follow-up period. If you ever  
933 change your mind, feel free to give us a call back and  
934 let us know. Thanks again for being in Hyperlink!  
935

936 Participant: *(No interest in being in more research)*  
937 Researcher: *(Offer same options as above in same order: option to participate via*  
938 *mail, option to consent to medical records)*  
939

---

940  
941 Outcome of recruitment attempt: *(Not interested, verbally consented to med records only,*  
942 *surveys via mail, surveys via phone, clinic visit at Riverside, clinic visit*  
943 *option for elsewhere)*  
944

945 Scheduled: *(Schedule in future, Successfully scheduled)*  
946

947 Best time to call (for phone visits):  
948

949 Notes: *(open text box for any relevant notes)*  
950

951 **Appendix C: Follow-up Recruitment Letter**

952

953 *Note: This letter should be sent to participants if unable to reach after two attempts at sending*  
954 *the initial mailing to their home and calling for at least two weeks.*

955

956 Dear [Participant’s Name] or family member,

957

958

959 I am writing because my study team has been trying to reach you to discuss your participation in  
960 Hyperlink, the blood pressure study you were enrolled in for about 18 months between 2009-2012. We  
961 are inviting Hyperlink participants continue in the study by attending one or two more short clinic visits.  
962 These visits would help us understand the longer-term benefits of Hyperlink.

963

964 We have been unable to reach you either by phone or mail, but would greatly appreciate a response  
965 from you.

966

967 Please call us at 612-341-1950 and mention the Hyperlink study to discuss this opportunity with one of  
968 our research coordinators, Rachel or Ann.

969

970 If you would like to decline participation for any reason, you may call and inform us and we will not  
971 continue to contact you. If you are unable to respond to us for some reason, you may also have a  
972 trusted family member do so on your behalf.

973

974 Thank you and be well,

975

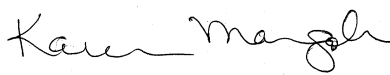 976  
977  
978

979 Karen Margolis, MD, MPH

980 Hyperlink Principal Investigator

981 HealthPartners Institute for Education and Research

982

983 **Appendix D: 54 Month Questionnaire**

984 **SECTION A- Health Habits**

985  
986 1. During an average week, how many days have you done the following types of activities?  
987

988 a. Vigorous or very hard physical activity that causes your heart to beat much faster  
989 than normal. It is hard to hold a conversation during this kind of activity. **Examples**  
990 **include: running, aerobics, tennis, swimming laps, cross-country skiing, aerobic**  
991 **machine at a fast pace, vigorous bicycling.**

992  
993 In the past month, how many days each week did you do vigorous physical activity for  
994 **20** minutes or more?

| 0                        | 1                        | 2                        | 3                        | 4                        | 5                        | 6                        | 7                        |
|--------------------------|--------------------------|--------------------------|--------------------------|--------------------------|--------------------------|--------------------------|--------------------------|
| <input type="checkbox"/> | <input type="checkbox"/> | <input type="checkbox"/> | <input type="checkbox"/> | <input type="checkbox"/> | <input type="checkbox"/> | <input type="checkbox"/> | <input type="checkbox"/> |

995  
996 b. Moderate physical activity causes your heart to beat faster than normal. Most people  
997 can hold a conversation during this kind of activity. **Examples include: Fast walking,**  
998 **dancing, easy bicycling, easy swimming.**

1000 In the past month, how many days each week did you do moderate physical activity for  
1001 **30** minutes or more?

| 0                        | 1                        | 2                        | 3                        | 4                        | 5                        | 6                        | 7                        |
|--------------------------|--------------------------|--------------------------|--------------------------|--------------------------|--------------------------|--------------------------|--------------------------|
| <input type="checkbox"/> | <input type="checkbox"/> | <input type="checkbox"/> | <input type="checkbox"/> | <input type="checkbox"/> | <input type="checkbox"/> | <input type="checkbox"/> | <input type="checkbox"/> |

1002  
1003 c. Light physical activity causes your heart to beat slightly faster than normal. **Examples**  
1004 **include: easy walking, yoga, bowling, golf.**

1005  
1006 In the past month, how many days each week did you do light physical activity for **30**  
1007 minutes or more?

| 0                        | 1                        | 2                        | 3                        | 4                        | 5                        | 6                        | 7                        |
|--------------------------|--------------------------|--------------------------|--------------------------|--------------------------|--------------------------|--------------------------|--------------------------|
| <input type="checkbox"/> | <input type="checkbox"/> | <input type="checkbox"/> | <input type="checkbox"/> | <input type="checkbox"/> | <input type="checkbox"/> | <input type="checkbox"/> | <input type="checkbox"/> |

1008  
1009  
1010 d. In the past month, how many days each week did you do activities to increase muscle  
1011 strength, such as lifting weights or calisthenics?

| 0                        | 1                        | 2                        | 3                        | 4                        | 5                        | 6                        | 7                        |
|--------------------------|--------------------------|--------------------------|--------------------------|--------------------------|--------------------------|--------------------------|--------------------------|
| <input type="checkbox"/> | <input type="checkbox"/> | <input type="checkbox"/> | <input type="checkbox"/> | <input type="checkbox"/> | <input type="checkbox"/> | <input type="checkbox"/> | <input type="checkbox"/> |

1015  
1016

- 1017 2. Have you smoked any cigarettes in the past 30 days?
- 1018  Yes
- 1019  No
- 1020
- 1021 3. Over the past 30 days, how many cigarettes did you usually smoke each day?
- 1022  Less than 1
- 1023  1-4
- 1024  5-14
- 1025  15-24
- 1026  25-34
- 1027  35-44
- 1028  45+
- 1029  I did not smoke cigarettes
- 1030
- 1031 4. Have you consumed any alcoholic beverages in the past 30 days?
- 1032  Yes
- 1033  No
- 1034
- 1035 5. Over the past 30 days, how many days per week did you consume alcoholic beverages?
- 1036  0-1
- 1037  2-3
- 1038  4-6
- 1039  7
- 1040  I did not consume alcohol
- 1041
- 1042 6. Over the past 30 days, how many alcoholic drinks did you consume each week?
- 1043  0-3
- 1044  4-6
- 1045  7-12
- 1046  More than 12
- 1047  I did not consume alcohol
- 1048
- 1049 7. How frequently do you add salt to your food after it is served at the table?
- 1050  Rarely
- 1051  Several times per week
- 1052  About once a day
- 1053  With almost all meals
- 1054
- 1055 8. How frequently do you add salt when preparing or cooking your food?
- 1056  Rarely
- 1057  Several times per week
- 1058  About once a day
- 1059  With almost all meals

1060 9. In the past 6 months, have you made any lifestyle changes as part of your treatment for  
1061 hypertension? (Mark all that apply):

1062  Low salt diet

1063  Other dietary changes (such as DASH diet, ate more fruits and vegetables)

1064  Cut back on alcohol

1065  Weight loss

1066  Increased physical activity

1067  I did not make any of these lifestyle changes

1068

1069

1070 **SECTION B - Your health care**

1071 The following questions ask you to rate your confidence in your ability to do certain things that  
 1072 relate to health care and managing your blood pressure. In these questions, health care could  
 1073 be received in person, by phone, or a secure email message. Health care includes taking  
 1074 medications that were prescribed for you.

| How confident are you that you can:                                                    | Not confident |   |   |   | Very confident |
|----------------------------------------------------------------------------------------|---------------|---|---|---|----------------|
|                                                                                        | 1             | 2 | 3 | 4 | 5              |
| 10. Ask a question of a nurse or pharmacist, even if they are busy?                    |               |   |   |   |                |
| 11. Talk to a nurse or pharmacist when you have concerns about your treatment?         |               |   |   |   |                |
| 12. Get a nurse or pharmacist to fully respond to your questions to your satisfaction? |               |   |   |   |                |
| 13. Contact a nurse or pharmacist from home when you have a question or concern?       |               |   |   |   |                |
| 14. Ask questions of your health care team at the clinic, even if they are busy?       |               |   |   |   |                |
| 15. Talk to your health care team when you have concerns about your treatment?         |               |   |   |   |                |
| 16. Get your health care team to fully respond to your questions to your satisfaction? |               |   |   |   |                |
| 17. Contact your health care team from home when you have a question or concern?       |               |   |   |   |                |
| 18. Include checking your blood pressure at home in your weekly routine?               |               |   |   |   |                |
| 19. Include your taking medication in your daily routine?                              |               |   |   |   |                |
| 20. Stick to taking medication even when your daily routine changes?                   |               |   |   |   |                |
| 21. Afford your medications?                                                           |               |   |   |   |                |
| 22. Keep your blood pressure under control?                                            |               |   |   |   |                |

1075  
 1076  
 1077

1078 **SECTION C - Satisfaction with your health care**

1079 The following questions ask about your satisfaction with your health care and health care  
 1080 providers. For the following questions, a health provider could be a doctor, nurse, nurse  
 1081 practitioner, clinical pharmacist, or any other person from whom you receive health care.  
 1082 Answer "unable to assess" if you didn't have enough interaction with health providers to  
 1083 answer the question.  
 1084

|                                                                                                                                                  | Never                    | Sometimes                | Usually                  | Always                   | Unable to assess         |
|--------------------------------------------------------------------------------------------------------------------------------------------------|--------------------------|--------------------------|--------------------------|--------------------------|--------------------------|
| 23. In the past <u>6 months</u> , how often did your health providers listen carefully to you?                                                   | <input type="checkbox"/> | <input type="checkbox"/> | <input type="checkbox"/> | <input type="checkbox"/> | <input type="checkbox"/> |
| 24. In the past <u>6 months</u> , how often did your health providers explain things in a way that you could understand?                         | <input type="checkbox"/> | <input type="checkbox"/> | <input type="checkbox"/> | <input type="checkbox"/> | <input type="checkbox"/> |
| 25. In the past <u>6 months</u> , how often did your health providers show respect for what you had to say?                                      | <input type="checkbox"/> | <input type="checkbox"/> | <input type="checkbox"/> | <input type="checkbox"/> | <input type="checkbox"/> |
| 26. In the past <u>6 months</u> , how often did your health providers spend enough time with you?                                                | <input type="checkbox"/> | <input type="checkbox"/> | <input type="checkbox"/> | <input type="checkbox"/> | <input type="checkbox"/> |
| 27. In the past <u>6 months</u> , how much of a problem, if any, was it to get the care, tests, or treatment you or a doctor believed necessary? | <input type="checkbox"/> | <input type="checkbox"/> | <input type="checkbox"/> | <input type="checkbox"/> | <input type="checkbox"/> |

1085  
 1086 28. Using numbers 1-5, where 1 is the worst health care possible and 5 is the best health care  
 1087 possible, what number would you use to rate all your health care in the last 6 months?

|                          |                          |                          |                          |                          |                          |
|--------------------------|--------------------------|--------------------------|--------------------------|--------------------------|--------------------------|
| Worst                    |                          |                          |                          |                          | Best                     |
| 1                        | 2                        | 3                        | 4                        | 5                        |                          |
| <input type="checkbox"/> | <input type="checkbox"/> | <input type="checkbox"/> | <input type="checkbox"/> | <input type="checkbox"/> | <input type="checkbox"/> |

1088  
 1089 29. Using numbers 1-5, where 1 is the worst hypertension care possible and 5 is the best  
 1090 hypertension care possible, what number would you use to rate your hypertension care in the  
 1091 last 6 months?

|                          |                          |                          |                          |                          |                          |
|--------------------------|--------------------------|--------------------------|--------------------------|--------------------------|--------------------------|
| Worst                    |                          |                          |                          |                          | Best                     |
| 1                        | 2                        | 3                        | 4                        | 5                        |                          |
| <input type="checkbox"/> | <input type="checkbox"/> | <input type="checkbox"/> | <input type="checkbox"/> | <input type="checkbox"/> | <input type="checkbox"/> |

1092  
 1093



1094 **SECTION D – Your blood pressure**

1095

1096 30. Do you currently take any medication for your hypertension (high blood pressure)?

1097  Yes

1098  No (Skip to Question #31)

1099

1100 a. Do you ever forget to take your blood pressure medicine?

1101  Yes

1102  No

1103

1104 b. Are you careless at times about taking your blood pressure medicine?

1105  Yes

1106  No

1107

1108 c. When you feel better do you sometimes stop taking your blood pressure medicine?

1109  Yes

1110  No

1111

1112 d. Sometimes if you feel worse when you take your blood pressure medicine, do you  
1113 stop taking it?

1114  Yes

1115  No

1116

1117 e. Have you skipped doses of blood pressure medicine in the past month?

1118  Yes

1119  No

1120

1121 31. In the last 6 months, did you ever measure your blood pressure using a home blood  
1122 pressure monitor?

1123  Yes

1124  No

1125

1126 32. In the last 6 months, on average, how many times did you measure your blood pressure  
1127 using a blood pressure monitor at home?

1128  Less than once a month

1129  A few times a month

1130  Once a week or more

1131  I did not do this

1132

1133 33. When you used a home blood pressure monitor in the last 6 months, did you share your  
1134 blood pressure measurements with a health care provider like a doctor, nurse, or pharmacist?  
1135 (Mark all that apply)

1136  Yes, I wrote my blood pressure numbers down on paper to share

- 1137  Yes, I read my blood pressure numbers verbally to them over the phone
- 1138  Yes, I sent my blood pressure numbers via e-mail
- 1139  Yes, I sent my blood pressure numbers electronically by Smartphone, computer, or
- 1140 telemonitor
- 1141  Yes, I shared my blood pressure numbers with a provider some other way (please
- 1142 specify): \_\_\_\_\_
- 1143  No, I did not do this

1144  
1145

1146 34. In the last 6 months, have you spoken with a pharmacist about managing your  
1147 hypertension? (Mark all that apply)

- 1148  Yes, when picking up medicine at the pharmacy
- 1149  Yes, I had an appointment with a clinical (MTM) pharmacist by phone or in the clinic
- 1150  Yes, in some other environment (please specify): \_\_\_\_\_
- 1151  No, I did not do this

1152  
1153  
1154

1155 **SECTION E- About You**

1156

1157 35. Which of the following best describes you current paid work status?

- 1158  Working full time
- 1159  Working part time
- 1160  Retired
- 1161  Not currently working

1162

1163 36. Approximately how many hours do you work in a week? (For example, if you work 38 hours  
1164 on average, you would enter '3' in the first column and '8' in the second column)

1165

|                          |                          |                          |   |
|--------------------------|--------------------------|--------------------------|---|
| <input type="checkbox"/> | 0                        | <input type="checkbox"/> | 0 |
| <input type="checkbox"/> | 1                        | <input type="checkbox"/> | 1 |
| <input type="checkbox"/> | 2                        | <input type="checkbox"/> | 2 |
| <input type="checkbox"/> | 3                        | <input type="checkbox"/> | 3 |
| <input type="checkbox"/> | 4                        | <input type="checkbox"/> | 4 |
| <input type="checkbox"/> | 5                        | <input type="checkbox"/> | 5 |
| <input type="checkbox"/> | 6                        | <input type="checkbox"/> | 6 |
| <input type="checkbox"/> | 7                        | <input type="checkbox"/> | 7 |
| <input type="checkbox"/> | 8                        | <input type="checkbox"/> | 8 |
| <input type="checkbox"/> | 9                        | <input type="checkbox"/> | 9 |
| <input type="checkbox"/> | More than 100 hours/week |                          |   |

1166

1167 37. About how much money do you estimate that you make in an hour? (Pick the choice that is  
1168 closest).

- 1169  Less than \$10/hour
- 1170  \$10/hour (would be \$20,000/year)
- 1171  \$15/hour (would be \$30,000/year)
- 1172  \$20/hour (would be \$40,000/year)
- 1173  \$25/hour (would be \$50,000/year)
- 1174  \$30/hour (would be \$60,000/year)
- 1175  \$35/hour (would be \$70,000/year)
- 1176  \$40/hour (would be \$80,000/year)
- 1177  \$45/hour (would be \$90,000/year)
- 1178  \$50/hour (would be \$100,000/year)
- 1179  Greater than \$50/hour

1180

1181 **Appendix E: Focus Group Recruitment letter**

1182

1183

1184

1185 (Date)

1186

1187 Dear (*participant*),

1188

1189 We are writing to thank you for your participation in the Hyperlink study. You have recently  
1190 completed a long-term follow-up visit at Riverside Clinic, around 5 years after your original  
1191 Hyperlink visit. Your dedication to our research is greatly appreciated!

1192

1193 Because you have stayed with our study for so long, we would like to invite you to participate in  
1194 a discussion group about blood pressure and blood pressure management.

1195

1196 The discussion group would be held in the late afternoon or early evening on a weeknight at  
1197 Riverside Clinic and would last about 60-90 minutes. The discussion group would be made up of  
1198 other Hyperlink participants similar to you in some ways.

1199

1200 We are inviting you to this discussion group because we value your insight about blood  
1201 pressure management and believe we have more to learn from you. The information we learn  
1202 from these discussion groups will advise further development of our programs to support  
1203 patients in achieving healthy blood pressure.

1204

1205 The group we are inviting you to would be held on: (*insert date and time options here*)  
1206 You will receive a gift card to Target of \$50, refreshments, and free parking as a thank you for  
1207 your participation.

1208

1209 We will be calling you in the next few days to discuss this opportunity further! You can also feel  
1210 free to call Anna Bergdall, the Hyperlink study Project Manager, at **952-967-5101** to express  
1211 interest or decline.

1212

1213

1214 Thank you, and we look forward to talking more soon!

1215

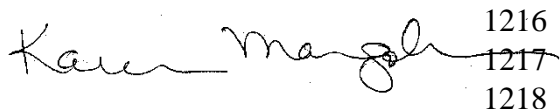 1216  
1217  
1218

1219 Dr. Karen Margolis

1220

1221

1222

1223 **Appendix F: Focus group facilitation guide**

1224

1225

**Focus Group Discussion Guide (Intervention groups)**

1226

**Prior to group beginning:** Each patient should meet with a coordinator to be individually consented, receive a nametag and offered refreshments.

1227

1228

1229 **Introduction**

1230

- Names/introductions

1231

- Thank you for being here

1232

- Why we are here/purpose of discussion

1233

- Ground rules, encouraging discussion, etc

1234

1235

**I'd like to begin by talking about high blood pressure in general. Could you tell me about the kinds of things that affect blood pressure in your experience?**

1236

1237

*Could you tell me about... (sub-questions if topics do not arise spontaneously)*

1238

-What kinds of things do you do now to help your BP?

1239

-What makes it hard to keep your BP in a healthy range?

1240

-How easy or difficult do you find it to take care of your BP?

1241

-History of high BP

1242

Probes: Could you tell me about a time when your BP was healthy/unhealthy? What do you feel helped you get it

1243

into a healthy range? Could you tell me about a time when you especially struggled? Why do you think that was?

1244

Dimensions: Medication use and adherence; health care providers; lifestyle efforts; home monitoring; psycho-social stress; social/family environment; self-efficacy

1245

1246

1247

**Now let's think back to the time that you were coming to this clinic for the Hyperlink research study.**

1248

**I'd like to hear about your experience with your blood pressure during that time.**

1249

-What was most helpful for you then?

1250

-Did you still have challenges with your BP during that time? If so, why do you think so?

1251

-What kinds of things could be changed to make it better for you?

1252

Probes: How did you feel about working with the pharmacist? What about taking your BP at home? What about

1253

those things did you like or dislike? Why? (only if pharmacist or home BP were already mentioned). How did those

1254

things change other areas of your health? How did those things help you with other efforts, like stress, lifestyle,

1255

talking with your health providers, etc? (refer to items mentioned above)

1256

Dimensions: Medication adherence, Rx changes, getting new Rxs; using home BP monitor, adherence, using new

1257

technology; relationships with pharmacists; congruence of intervention with other health care; lifestyle efforts;

1258

social/family environment; self-efficacy; KEY challenges and KEY factors for success.

1259

1260

**Wrap-up: Is there anything anyone would like to add to or clarify, or does anyone have any questions?**

1261

Thank you for taking the time to share your experiences with us. We value your input and take your

1262

feedback very seriously. We are all looking forward to helping to create better solutions to help people

1263

with their blood pressure.

1264

1265

1266 **Focus Group Discussion Guide** (Usual Care groups)

1267

1268 **Prior to group beginning:** Each patient should meet with a coordinator to be individually consented,  
1269 receive a nametag and offered refreshments.

1270

1271 **Introduction**

- 1272 • Names/introductions
- 1273 • Thank you for being here
- 1274 • Why we are here/purpose of discussion
- 1275 • Ground rules, encouraging discussion, etc

1276

1277 **I'd like to begin by talking about high blood pressure in general. Could you tell me about the kinds of**  
1278 **things that affect blood pressure in your experience?**

1279 *Could you tell me about... (sub-questions if topics do not arise spontaneously)*

1280 -What kinds of things do you do now to help your BP?

1281 -What makes it hard to keep your BP in a healthy range?

1282 -How easy or difficult do you find it to take care of your BP?

1283 -History of high BP

1284 Probes: Could you tell me about a time when your BP was healthy/unhealthy? What do you feel helped you get it  
1285 into a healthy range? Could you tell me about a time when you especially struggled? Why do you think that was?

1286 Dimensions: Medication use and adherence; health care providers; lifestyle efforts; home monitoring; psycho-social  
1287 stress; social/family environment; self-efficacy

1288

1289 **Now let's think back to the time that you were coming to this clinic for the Hyperlink research study.**

1290 **I'd like to hear about your experience with your blood pressure during that time.**

1291 -What was most helpful for you then?

1292 -Did you still have challenges with your BP during that time? If so, why do you think so?

1293 -What kinds of things could be changed to make it better for you?

1294 Probes: What kinds of health care providers were you working with at that time? What kinds of efforts were you  
1295 doing on your own to help your BP? Did your health care providers help you overcome challenges you faced (like  
1296 stress, lifestyle challenges)? What about working with your providers was difficult?

1297 Dimensions: Medication adherence, Rx changes, getting new Rx's; using home BP monitor, adherence, using new  
1298 technology; relationships with pharmacists; congruence of intervention with other health care; lifestyle efforts;  
1299 social/family environment; self-efficacy; KEY challenges and KEY factors for success.

1300

1301 **Wrap-up: Is there anything anyone would like to add to or clarify, or does anyone have any questions?**

1302 Thank you for taking the time to share your experiences with us. We value your input and take your  
1303 feedback very seriously. We are all looking forward to helping to create better solutions to help people  
1304 with their blood pressure.

1305

1306

1307

1308

1309 **Appendix G: Pharmacist Interview guide**

1310

1311 **Introduction**

- 1312 • Introduction/names
- 1313 • Thank you for being here

1314

1315 **Purpose of this interview**

1316 *The purpose of this interview is to gather your reflections on being an intervention pharmacist for the*  
1317 *Hyperlink study. We are in the process of talking to patients about their experience in Hyperlink for the*  
1318 *sake of trying to understand what worked well in the study and what didn't work so well to help patients*  
1319 *get their blood pressure under control, and why. Your clinical perspective as an intervention pharmacist*  
1320 *is helpful also, so we can ultimately understand how to better target this type of intervention for patients*  
1321 *in a practice setting.*

1322

1323

1324

1325 **Let's start by talking about what MTM is. Could you please explain in your own words what an MTM**  
1326 **pharmacist is and how it differs from other types of pharmacists?**

1327 Probes: What are the credential/degree requirements? What is your prescribing power like? How is an MTM  
1328 pharmacist differentiated in the clinic setting from the pharmacist one talks to when getting a med filled? How do  
1329 you think patients understand your role as a pharmacist?

1330 Dimensions: *Scope of work; patient perceptions*

1331

1332

1333

1334 **What is your day to day work like, and what kinds of patients do you work with?**

1335 Probes: What is the nature of work you do with your patients; What is the structure of their care within this clinic;  
1336 How are patients referred to you (self-referral vs. referral by clinicians or disease management); Can you describe  
1337 your relationship with specialty care or primary care? How do you interact with physicians? Are you currently  
1338 working with any patients doing home monitoring of chronic conditions, and if so, what?

1339 Dimensions: *Relationship to primary care team; regular daily functions of MTM care*

1340

1341

1342

1343 **Could you describe your recollections of your experience working with Hyperlink patients?**

1344 Probes: Could you tell me about what you enjoyed about it? What do you recall being difficult/challenging? Could  
1345 you tell me about a particular patient that sticks out in your mind and why?

1346 Dimensions: *Study protocol vs. practice (specific feedback); relationships with patients; relationships with PCPs*

1347

1348

1349

1350

1351  
1352  
1353  
1354  
1355  
1356  
1357  
1358  
1359  
1360  
1361  
1362  
1363  
1364  
1365  
1366  
1367  
1368  
1369  
1370  
1371  
1372  
1373  
1374  
1375  
1376  
1377  
1378  
1379  
1380  
1381  
1382  
1383  
1384  
1385  
1386  
1387  
1388  
1389  
1390  
1391  
1392  
1393  
1394

**What are your opinions or ideas about why some people were more successful in lowering their BP with this intervention than others?**

Probes: What makes some patients difficult for this kind of intervention? What do you feel helped patients the most? What did a very successful patient look like to you? What were some common “sticky points” for patients, presenting barriers? Can you tell me about your thoughts of med intensification vs. telemonitoring? – Specific patient examples come to mind? Typologies? How did your first impression of a patient hold up over time?  
Dimensions: *Med adherence; lifestyle efforts/counseling; relationship with patients; psycho-social stress; self-efficacy; barriers and facilitators; home monitoring equipment; PCP relationship; clinical judgment*

**Could you describe in your clinical judgment what you believe the most important “active ingredients” are to this type of intervention?**

Probe: Do you see any difference in effectiveness of medication intensification versus telemonitoring? What about patient’s time of involvement: what do you think is the optimal time? Do you see any use in continuing to counsel or meet with patients after they achieve control? How long do patients really need with this kind of program to see the best results?  
Dimensions: *Targeted intervention; medication intensification vs. telemonitoring; active ingredients*

**You may recall there was a fairly specific protocol in place for this study: Phone visits every two weeks unless the patient was under control, assessments of adherence at each visit, and medication-related actions to be taken at certain visits, depending on the patient’s blood pressure and time in the study. Can you tell me about how that protocol worked for you in practice?**

Probes: Can you tell me about which pieces of the intervention you made sure to follow protocol on, and which you felt you didn’t always follow? What pieces did you adjust to fit more consistently with your regular practice? How did the study protocol prompt different actions than you would have taken without the study? How did you use the AMC website where you went to see the BP readings? What was challenging for you about that protocol? What parts did you feel were most essential for providing the best BP care for your patients?  
Dimensions: *Study protocol vs. practice; treatment titration protocol; adherence assessments; 3<sup>rd</sup> party BP data*

**Can you tell me about the relationship you had with the Primary Care Providers during this study?**

Probes: How did you interact with primary care physicians? How does the relationship you had with PCPs during the study look similarly or different to your day to day MTM work? What type of communication do you have with PCPs around specific patients’ care? What are some specific barriers to doing so? How do you think this communication affects patients’ care? How do you think your work with PCPs can help patients feel like they have a cohesive care team working with them? do you think patients perceived of you versus their primary care? How are most patients referred between MTMs and PCPs (self or outside, vs. pcp referral)? When does this collaboration need to be strong and when doesn’t it? This study served as a connecting point between pharmacists and docs/system, how can patients be more connected between all?



1395 *Dimensions: Team-based care; communication with PCPs; communication/relationship with patients; referral*  
1396 *channels;*

1397

1398 **What ideas do you have about offering this intervention to patients in our clinics in a non-study**  
1399 **setting?**

1400 *Probes:* If you could create your own intervention of this kind for patients with uncontrolled blood pressure, what  
1401 would it look like? What elements of the Hyperlink intervention are in your opinion essential? What would you  
1402 change (or remove or add)? Do you have ideas to make this kind of program work for people who had a difficult  
1403 time in Hyperlink? What do you see as major barriers to implementing this kind of program into day to day  
1404 pharmacy practice? What about facilitators? What about in a practice setting that is different from HealthPartners  
1405 with less infrastructure?

1406 *Dimensions: Targeted intervention; active ingredients; implementation and uptake*

1407

1408

1409

1410 **Is there any other feedback you received from patients that you would like to share with us about**  
1411 **Hyperlink?**

1412 *Probes:* Can you think of any patients who exemplify the success or difficulties we talked about today? If so, do you  
1413 think they would be useful to interview (i.e., do you think they could share insights with us we haven't already  
1414 heard?)

1415

1416

1417

1418

1419 **Wrap-up: Is there anything else you'd like to add to or clarify, or do you have any questions?**

1420 *Thank you for taking the time to share your experiences with us. Your input as an interventionist is highly*  
1421 *valuable as we move forward with creating this type of intervention for our patients. If you have any*  
1422 *other feedback after we are done we would love to hear from you.*

1423

## 1424 **Anti-hypertensive Medications**

1425

### 1426 **ACE Inhibitors**

1427 Benazepril (Lotensin)

1428 Captopril (Capoten)

1429 Cilazapril (Inhibace)

1430 Enalapril (enalaprilat, Vasotec)

1431 Fosinopril (Monopril)

1432 Lisinopril (Prinivil, Zestril)

1433 Moexipril (Univasc)

1434 Perindopril (Aceon, Coversyl)

1435 Quinapril (Accupril)

1436 Rampiril (Altace)

1437 Trandolapril (Mavik)

1438

### 1439 **Aldosterone Antagonists**

1440 Eplerenone (Inspra)

1441 Spironolactone (Aldactone)

1442

### 1443 **Angiotensin Receptor Blockers (ARBs)**

1444 Azilsartan (Edarbi)

1445 Candesartan (Atacand)

1446 Erposartan (Teveten)

1447 Irbesartan (Avapro)

1448 Losartan (Cozaar)

1449 Olmesartan (Benicar)

1450 Telmisartan (Micardis)

1451 Valsartan (Diovan)

1452

### 1453 **Anti-adrenergic Agents (Alpha blockers)**

1454 Clonidine (Catapres, Catapres-TTS, Jenloga, Kapvay, Dixarit) – *May have other non-HTN uses (ADHD, Tourette, Opioid withdrawal, menopausal flushing, smoking cessation, alcohol withdrawal)*

1455 Doxazosin (Cardura, Cardura XL) – *May be used for BPH (enlarged prostate)*

1456 Methyldopa (Aldomet)

1457 Prazosin (Minipress)

1458 Terazosin (Hytrin)

1460

### 1461 **Beta-blockers**

1462 Acebutolol (Sectral)

1463 Atenolol (Tenormin) – *also be used for acute MI*

1464 Bisoprolol (Zebeta, Monacor)

1465 Carvedilol (Coreg, Coreg CR) – *May also be used for heart failure, post-MI treatment*

1466 Esmolol (Brevibloc) – *May also be used for supraventricular tachycardia*

1467 Labetalol (Trandate)

1468 Metoprolol (Lopressor, Toprol-XL, Betaloc) – *May also be used for acute MI, heart failure, and angina*

1469 Nadolol (Corgard) – *May also be used to prevent rebleeding esophageal varices*

1470 Nebivolol (Bystolic)

1471 Propranolol (Inderal, Inderal LA, InnoPran XL) – *May also be used for supraventricular tachycardia or rapid atrial fibrillation/flutter, migraines, and to prevent rebleeding esophageal varices*

1473

### 1474 **Calcium channel blockers – Dihydropyridines**

- 1475 Amlodipine (Norvasac)  
1476 Clevidipine (Cleviprex)  
1477 Felodipine (Plendil, Renedil)  
1478 Isradipine (DynaCirc, Dynacirc CR)  
1479 Nicardipine (Cardene, Cardene SR)  
1480 Nifedipine (Procardia, Adalat, Procardia XL, Adalat CC, Afeditab CR, Adalat XL, Adalat PA) – *May also be used for*  
1481 *angina and pre-term labor*  
1482 Nisoldipine (Sular)  
1483  
1484 **Calcium channel blockers – Non-Dihydropyridines**  
1485 Diltiazem (Cardizem, Cardizem LA, Cardizem CD, Cartia XT, Dilacor XR, Diltiazem CD, Diltzac, Diltia XT, Tiazac, Taztia  
1486 XT) – *May also be used to treat atrial fibrillation/flutter or angina*  
1487 Verapamil (Isoptin SR, Calan, Covera-HS, Verelan, Verelan PM) – *May also be used for supraventricular tachycardia*  
1488 *or angina*  
1489  
1490 **Diuretics – Loop**  
1491 Bumetanide (Bumex, Burinex) – Mainly used for edema  
1492 Ethacrynic Acid (Edecrin) – Mainly used for edema  
1493 Furosemide (Lasix) – May also be used for edema, ascites  
1494 Rosemide (Demadex) – May also be used for edema  
1495  
1496 **Diuretics - Thiazide**  
1497 Chlorthalidone (Thalitone) – May also be used for kidney stones  
1498 Hydrochlorothiazide (HCTZ, Oretic, Microzide) – May also be used for edema  
1499 Indapamide (Lozol, Lozide) – May also be used for edema  
1500 Metolazone (Zaroxolyn) – Mainly used for edema  
1501  
1502 **Other**  
1503 Aliskiren (Tekturna, Rasilez)  
1504 Fenoldopam (Corlopam)  
1505 Hydralazine (Apresoline)  
1506 Nitroprusside (Nitropruss)  
1507 Phentolamine (Regitine, Rogitine)  
1508 Reserpine (Serpalan, Serpasil) – may also be used for severe agitation with mental disorders  
1509  
1510 **Pulmonary arterial hypertension** (different condition from essential hypertension)  
1511 Sildenafil (Revatio)  
1512 Tadalafil (Adcirca)  
1513  
1514 **Anti-hypertensive combination drugs**  
1515 Accuretic (quinapril + HCTZ)  
1516 Aldactazide (spironolactone + HCTZ)  
1517 Aldoril (methyldopa +HCTZ)  
1518 Amturnide (aliskiren + amlodipine +HCTZ)  
1519 Apresazide (hydralazine +HCTZ)  
1520 Atacand HCT (candesartan +HCTZ, Atacand Plus)  
1521 Avalide (irbesartan +HCTZ)  
1522 Azor (amlodipine + olmesartan)  
1523 Benicar HCT (olmesartan +HCTZ)  
1524 Caduet (amlodipine + atorvastatin)  
1525 Capozide (captopril + HCTZ)  
1526 Clorpres (clonidine + chlorthalidone)  
1527 Corzide (nadolol + bendroflumethiazide)

1528 Diovan HCT (valsartan +HCTZ)  
1529 Dutoprol (metoprolol succinate +HCTZ)  
1530 Dyazide (triamterene +HCTZ)  
1531 Edarbyclor (azilsartan + chlorthalidone)  
1532 Exforge (amlodipine + valsartan)  
1533 Exforge HCT (amlodipine + valsartan +HCTZ)  
1534 Hyzaar (losartan +HCTZ)  
1535 Inderide (propranolol +HCTZ)  
1536 Inhibace Plus (cilazapril +HCTZ)  
1537 Lexxel (enalapril + felodipine)  
1538 Lopressor HCT (metoprolol +HCTZ)  
1539 Lotensin HCT (benazepril +HCTZ)  
1540 Lotrel (amlodipine + benazepril)  
1541 Maxzide (triamerene + HCTZ, Triazide)  
1542 Micardis HCT (telmisartan + HCTZ, Micardis Plus)  
1543 Minizide (prazosin + polythiazide)  
1544 Moduretic (amiloride +HCTZ, Moduret)  
1545 Monopril HCT (fosinopril +HCTZ)  
1546 Prinzide (lisinopril +HCTZ)  
1547 Tarka (trandolapril + verapamil)  
1548 Tekamlo (aliskiren + amlodipine)  
1549 Tekturna HCT (aliskirin +HCTZ)  
1550 Tenoretic (atenolol + chlorthalidone)  
1551 Teveten HCT (eprosartan +HCTZ)  
1552 Tribenzor (amlodipine + olmesartan +HCTZ)  
1553 Twynsta (amlodipine +telmisartan)  
1554 Uniretic (moexipril + HCTZ)  
1555 Caseretic (enalapril +HCTZ)  
1556 Zesoretic (lisinopril + HCTZ)  
1557 Ziac (bisoprolol +HCTZ)  
1558  
1559
